# Supplementary material for: The Protein Tyrosine Phosphatase Rptpζ Suppresses Osteosarcoma Development in Trp53-Heterozygous Mice
Source: PubMed Central journal article supplement (PMC4567063; doi:10.1371/journal.pone.0137745), 2015-09-11
Supplement: pone.0137745.s003.pdf [file pone.0137745.s003.pdf]

| <b><i>Ptprz1</i> genotype</b> | <b>Gender</b> | <b>Age of OS detection</b> | <b>OS location</b> |
|-------------------------------|---------------|----------------------------|--------------------|
| <b>+/-</b>                    | female        | 52 wks                     | rib                |
| <b>+/-</b>                    | female        | 29 wks                     | long bone (tibia)  |
| <b>-/-</b>                    | male          | 52 wks                     | long bone (femur)  |
| <b>-/-</b>                    | male          | 16 wks                     | rib                |
| <b>-/-</b>                    | female        | 52 wks                     | spine (2 x)        |
| <b>-/-</b>                    | female        | 52 wks                     | spine (3 x)        |
| <b>-/-</b>                    | female        | 52 wks                     | long bone (femur)  |
| <b>-/-</b>                    | female        | 47 wks                     | spine (2 x)        |
| <b>-/-</b>                    | female        | 47 wks                     | spine              |
